# Supplementary material for: Privacy Challenges to the Democratization of Brain Data
Source: PubMed Central journal article supplement (PMC7235278; doi:10.1016/j.isci.2020.101134), 2020-05-05
Supplement: mmc1.pdf [file mmc1.pdf]

**iScience, Volume 23**

**Supplemental Information**

**Privacy Challenges to the Democratization of Brain Data**

**Nicole Minielly, Viorica Hrinco, and Judy Illes**

## **SUPPLEMENTAL ITEMS**

### **TRANSPARENT METHODS**

Eight executives or their senior level representatives from DTC neurowearable companies that produce recording devices offered their time to speak with us. These semi-structured interviews took place in the context of larger study on incidental findings and adverse events involving representatives from both recording and stimulating device companies (Minielly et al., 2020). Interviews were conducted online via Zoom between August and November 2019 by either JI or NM and ranged between 11 and 35 minutes. We applied a structured secondary analysis of the data to identify privacy concerns (Cabrera et al., 2015).
